# Supplementary material for: Astrocytes in the Optic Nerve Are Heterogeneous in Their Reactivity to Glaucomatous Injury
Source: MDPI journal article supplement (doi:10.3390/cells12172131), 2023-08-23
Supplement: s1 [file s1]

## Supplementary Materials

**Supplementary Table S1: Group Summaries for RNA Sequencing**

| Group 1 |               | 13-week-young naïve |               |       |
|---------|---------------|---------------------|---------------|-------|
| Samples | Sample Number | RIN                 | Concentration |       |
| 1       | YNR1          | 9.2                 | 2298          | pg/μl |
| 2       | YNR2          | 9.2                 | 3469          | pg/μl |
| 3       | YNR3          | 9.7                 | 3859          | pg/μl |
| 4       | YNR4          | 9.8                 | 2498          | pg/μl |

| Group 2 |               | 40-week-old naïve |               |       |
|---------|---------------|-------------------|---------------|-------|
| Samples | Sample Number | RIN               | Concentration |       |
| 1       | ONR1          | 9.5               | 26187         | pg/μl |
| 2       | ONR2          | 9.8               | 11981         | pg/μl |
| 3       | ONR3          | 9.7               | 14769         | pg/μl |
| 4       | ONR4          | 9.9               | 12499         | pg/μl |

| Group 3 |               | 4-week saline injection group |               |       |
|---------|---------------|-------------------------------|---------------|-------|
| Samples | Sample Number | RIN                           | Concentration |       |
| 1       | 4SR1          | 9.2                           | 1170          | pg/μl |
| 2       | 4SR2          | 9.5                           | 600           | pg/μl |
| 3       | 4SR3          | 9.3                           | 543           | pg/μl |
| 4       | 4SR4          | 9.3                           | 3115          | pg/μl |

| Group 4 |               | 4-week bead injection group |               |       |
|---------|---------------|-----------------------------|---------------|-------|
| Samples | Sample Number | RIN                         | Concentration |       |
| 1       | 4BR1          | 9.1                         | 2363          | pg/μl |
| 2       | 4BR2          | 9                           | 4175          | pg/μl |
| 3       | 4BR3          | 9.2                         | 3718          | pg/μl |
| 4       | 4BR4          | 9.3                         | 3380          | pg/μl |

**Supplementary Table S2: Primer sequences**

|        | Forward                       | Reverse                       |
|--------|-------------------------------|-------------------------------|
| Abca1  | 5'-gcttgttggcctcagttaagg-3'   | 5'-gtagctcaggcgtacagagat-3'   |
| Abca7  | 5'-aattacacctatcgacggagaca-3' | 5'-tgacggacagccactagga-3'     |
| Clcf1  | 5'-gactcgtgggggatgttagc-3'    | 5'-ctaagctgcggagttgatgct-3'   |
| Dock1  | 5'-caggaagcataaatacctcgcc-3'  | 5'-cagctcatccgattgtctttgt-3'  |
| Emp1   | 5'-ttggtgctactggctggtct-3'    | 5'-cattgccgtaggacagggag-3'    |
| Fbln5  | 5'-gcttgtcgtggggacatgat-3'    | 5'-tggggtagttggaagctggta-3'   |
| Gapdh  | 5'-ggttgtctcctcgacttcaa-3'    | 5'-cctgttgctgtagccgtattcat-3' |
| Gfap   | 5'-cacgaacgagtccttagagc-3'    | 5'-atggtgatgcggttttcttc-3'    |
| Gulp1  | 5'-acagaagtgtgagagatgctg-3'   | 5'-gcagttgtgtgaacctcctt-3'    |
| H2-T23 | 5'-acagtcccgaaccagagtag-3'    | 5'-ccacgtagccgacaatgatga-3'   |
| Lamp1  | 5'-cagcactctttgaggtgaaaaac-3' | 5'-acgatctgagaaccattcgca-3'   |
| Lgals3 | 5'-ggagaggggaatgatgttcct-3'   | 5'-tcctgcttcgtgttacacaca-3'   |
| Megf10 | 5'-gaagaccccaacgtatgcag-3'    | 5'-cggtgcagcttgtgtagtaga-3'   |
| Mfge8  | 5'-agatgcgggtatcaggtgtga-3'   | 5'-ggggctcagaacatccgtg-3'     |
| Oaz1   | 5'-ccactgcttcgccagagag-3'     | 5'-ccccggaccaggttacta-3'      |
| Park2  | 5'-tcttccagtgaaccaccgtc-3'    | 5'-ggcaggagtagccaagtt-3'      |
| Pink1  | 5'-ttcttcgccagtcggtag-3'      | 5'-ctgcttcctcgtatcagcc-3'     |
| Psmb8  | 5'-atggcggtactggatctgtgc-3'   | 5'-cgcgagaaaactgtagtgtcc-3'   |
| Ptx3   | 5'-cctgcgatcctgctttgtg-3'     | 5'-ggtgggatgaagtccattgtc-3'   |
| Srgn   | 5'-ctcgcttcgtcctggttt-3'      | 5'-cctcgatgcagttcgaaaaa-3'    |
| Stat3  | 5'-caataccattgacctgccgat-3'   | 5'-gagcgactcaaactgcctt-3'     |
| Tgm1   | 5'-tctgggctcgttgtgtgg-3'      | 5'-aaccagcattccctctcgga-3'    |

Supplementary Figure S1: Schematic of the optic nerve

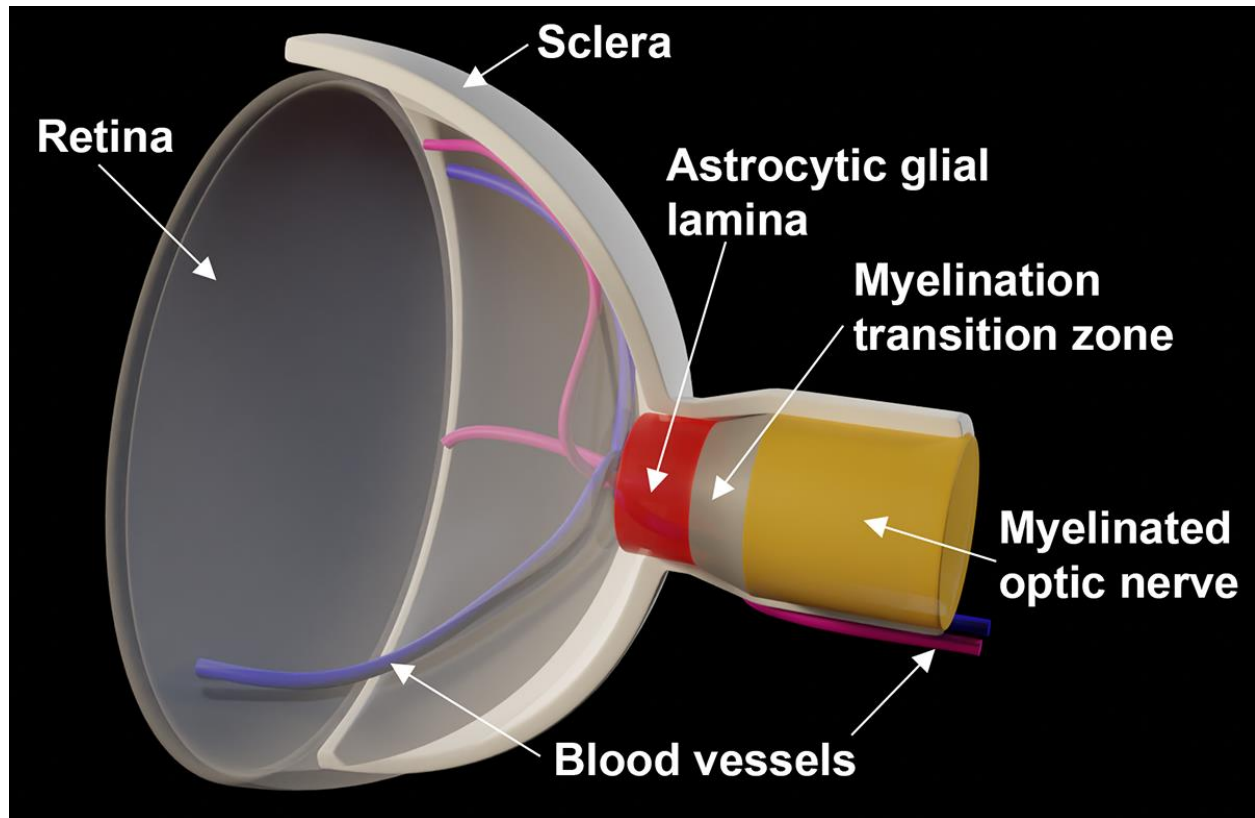

## Supplementary Figure S2: Principal Component Analysis

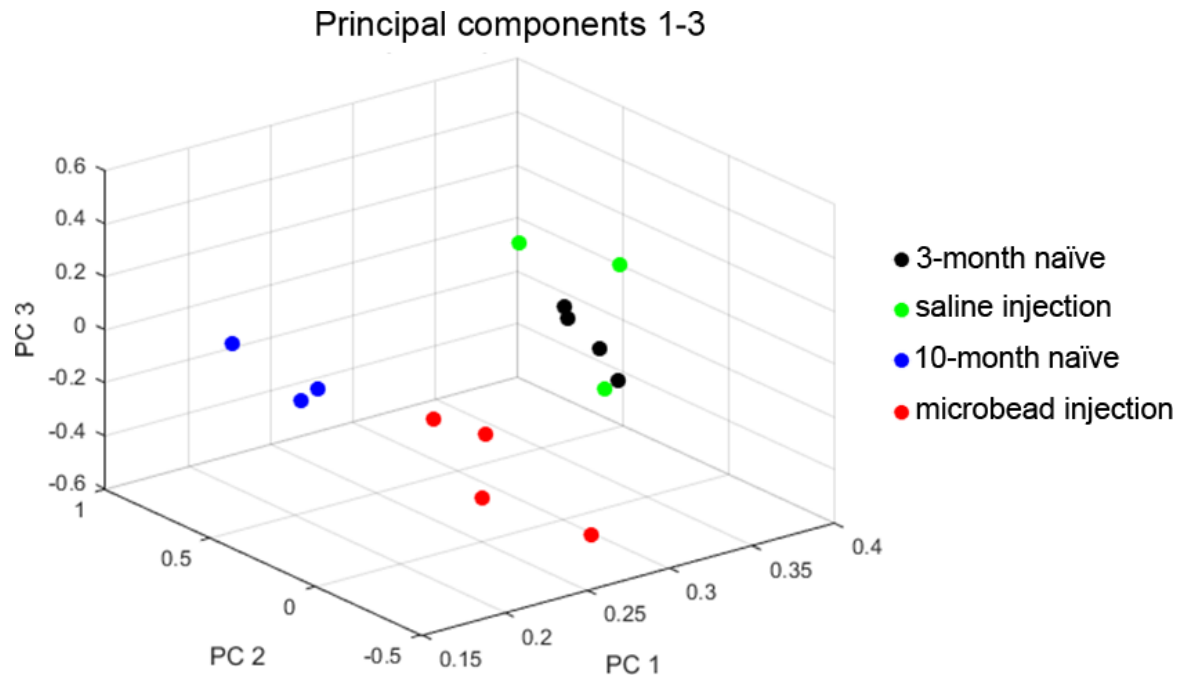

Scatter plot of the first 3 components, Principal Component Analysis of differentially expressed genes in microbead-injected nerves (red symbols), saline-injected nerves (green), young naïve nerves (black), and aged naïve nerves (blue).

Supplementary Figure S3: Intraocular pressure (IOP) after microbead injection

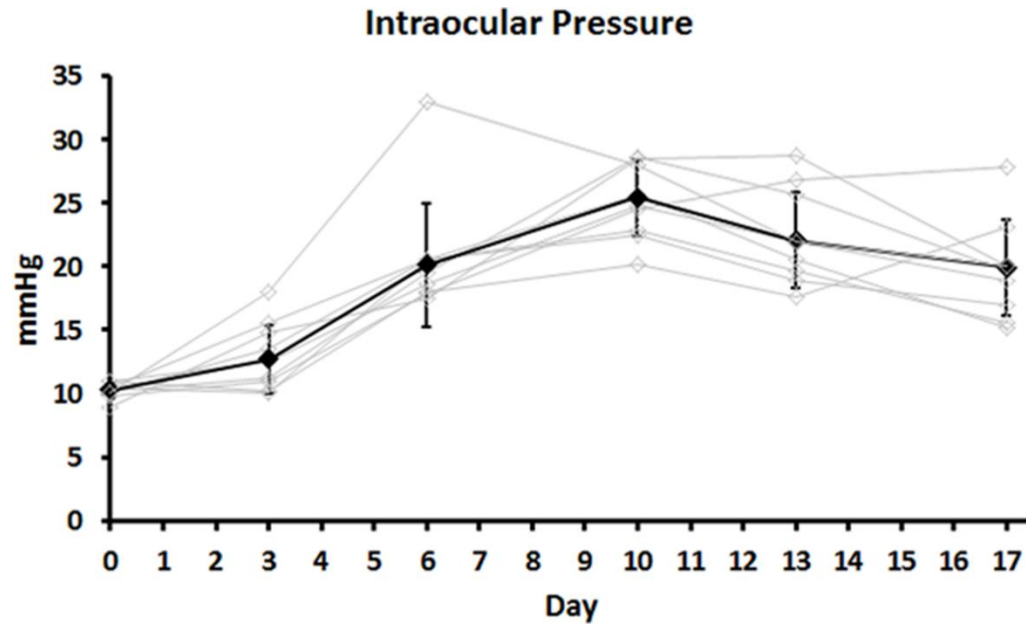

IOP curves after microbead injection into the anterior chambers of B6.*hGFAPpr::EGFP* mice. Thin grey lines represent individual eyes, and the bold black line shows the population average. Error bars represent the standard deviation.
